# Supplementary material for: Novel N-arylamide derivatives of (S)-perillic acid ((S)-PA): in vitro and in vivo cytotoxicity and antitumor evaluation
Source: Royal Society of Chemistry journal article supplement (doi:10.1039/c9ra03382c), 2019-01-01
Supplement: c9ra03382c1.pdf [file c9ra03382c1.pdf]

SPECTROSCOPIC AND HPLC ANALYSIS OF COMPOUNDS

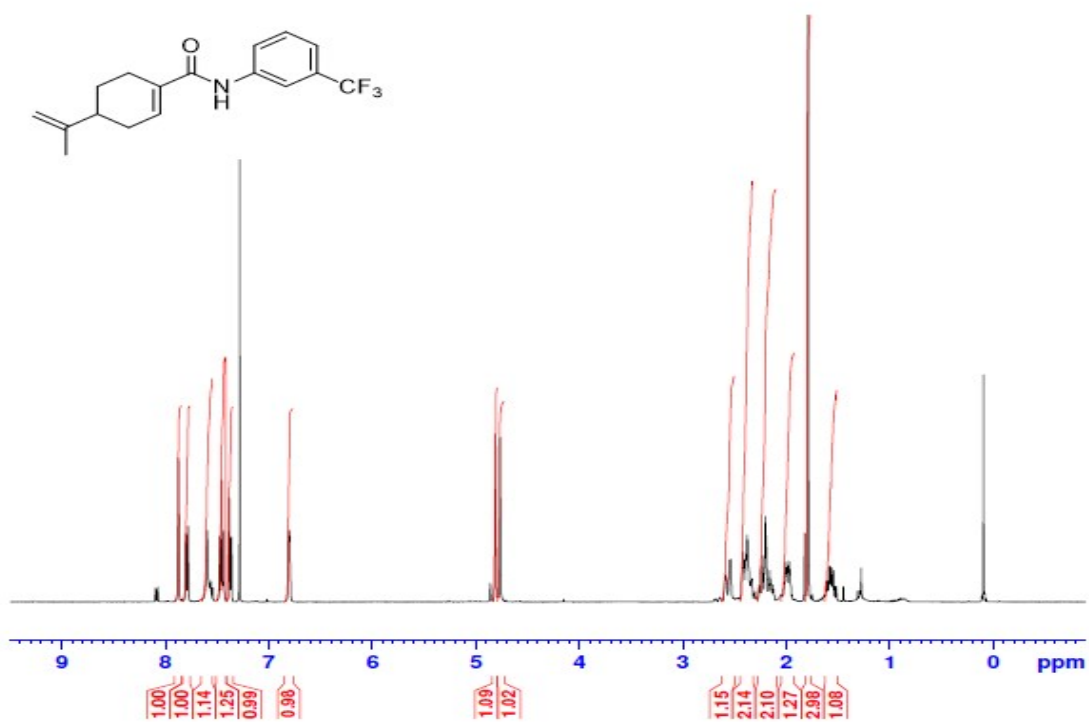

Figure S1 <sup>1</sup>H NMR spectrum of 4-(prop-1-en-2-yl)-N-(3-(trifluoromethyl)phenyl)cyclohex-1-ene-1-carboxamide (**4**) obtained on NMR spectrometer (Bruker 400 Ultra Shield™)

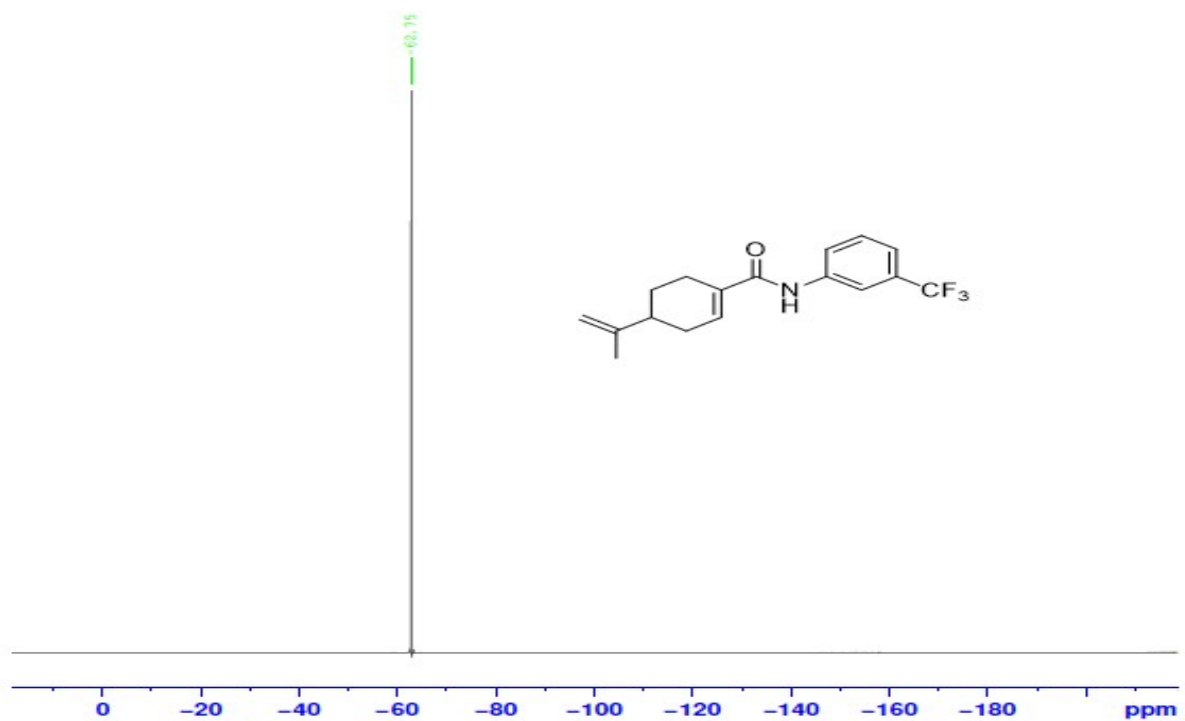

Figure S2  $^{19}\text{F}$  NMR spectrum of 4-(prop-1-en-2-yl)-N-(3-(trifluoromethyl)phenyl)cyclohex-1-ene-1-carboxamide (**4**) obtained on NMR spectrometer (Bruker 400 Ultra Shield™)

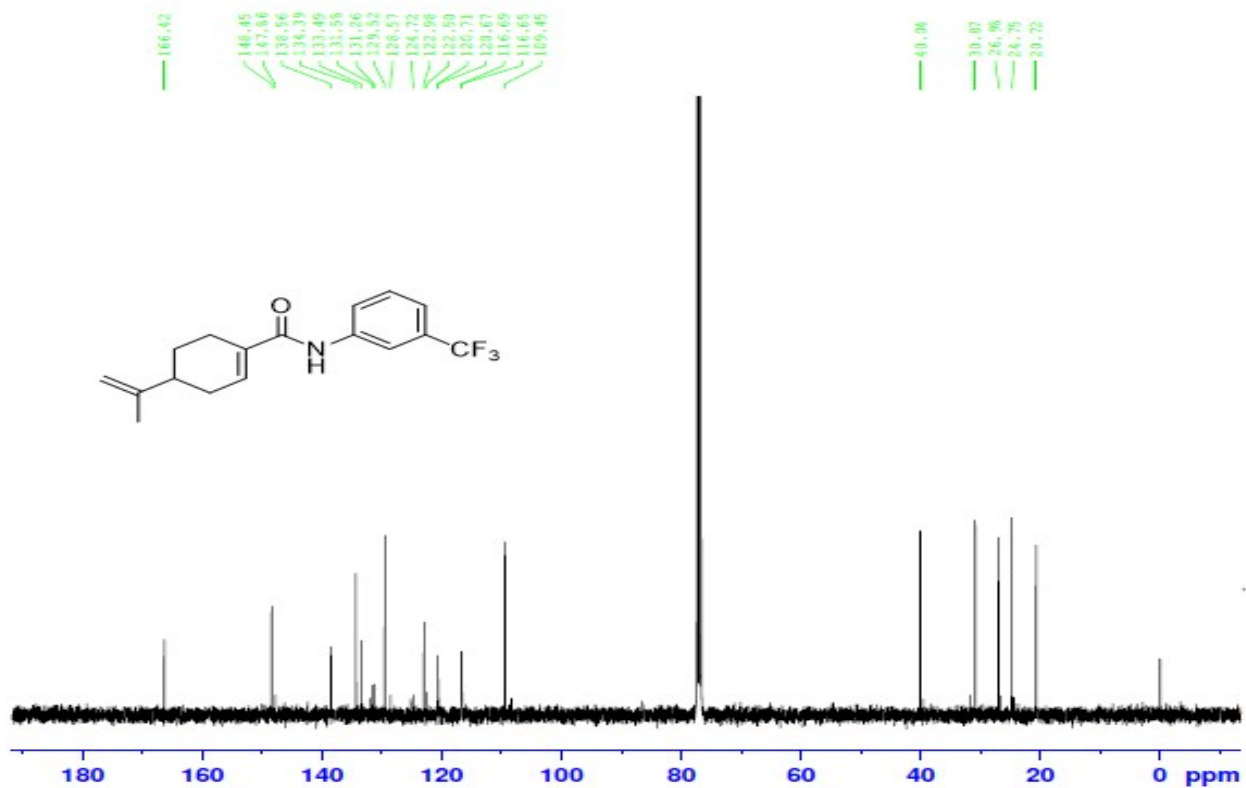

Figure S3 <sup>13</sup>C NMR spectrum of 4-(prop-1-en-2-yl)-N-(3-(trifluoromethyl)phenyl)cyclohex-1-ene-1-carboxamide (**4**) obtained on NMR spectrometer (Bruker 400 Ultra Shield™)

Spectrum from 4.wiff (sample 1) - 4, ..., +TOF MS (100 - 2500) from 6.316 min

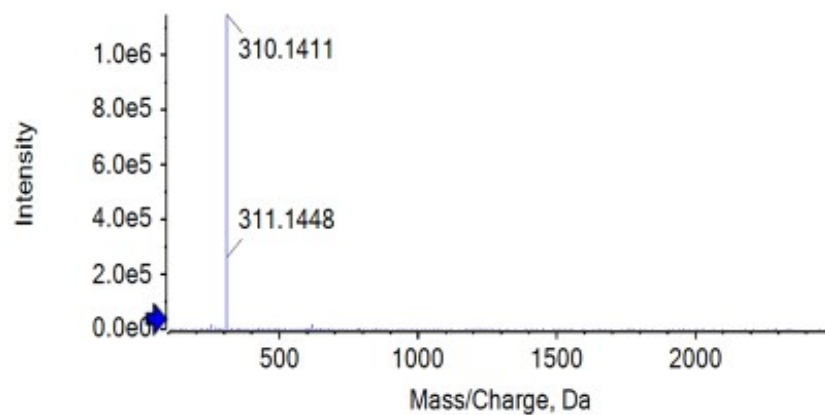

Figure S4 HRMS of 4-(prop-1-en-2-yl)-N-(3-(trifluoromethyl)phenyl)cyclohex-1-ene-1-carboxamide (**4**), [M+H] peak

6\_171130144811#231 RT: 0.54 AV: 1 NL: 2.29E3  
T: ITMS - c ESI Full ms [50.00-600.00]

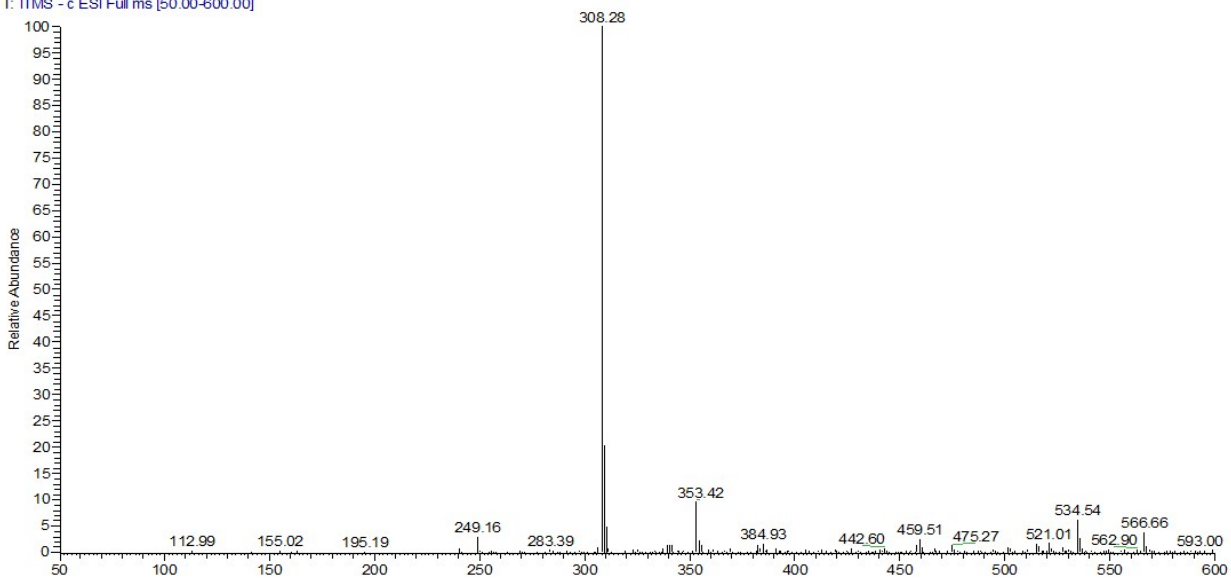

Figure 5 negative ESI-mass spectrum of 4-(prop-1-en-2-yl)-N-(3-(trifluoromethyl)phenyl)cyclohex-1-ene-1-carboxamide (**4**), [M-H] peak obtained on liquid- Mass spectrometer

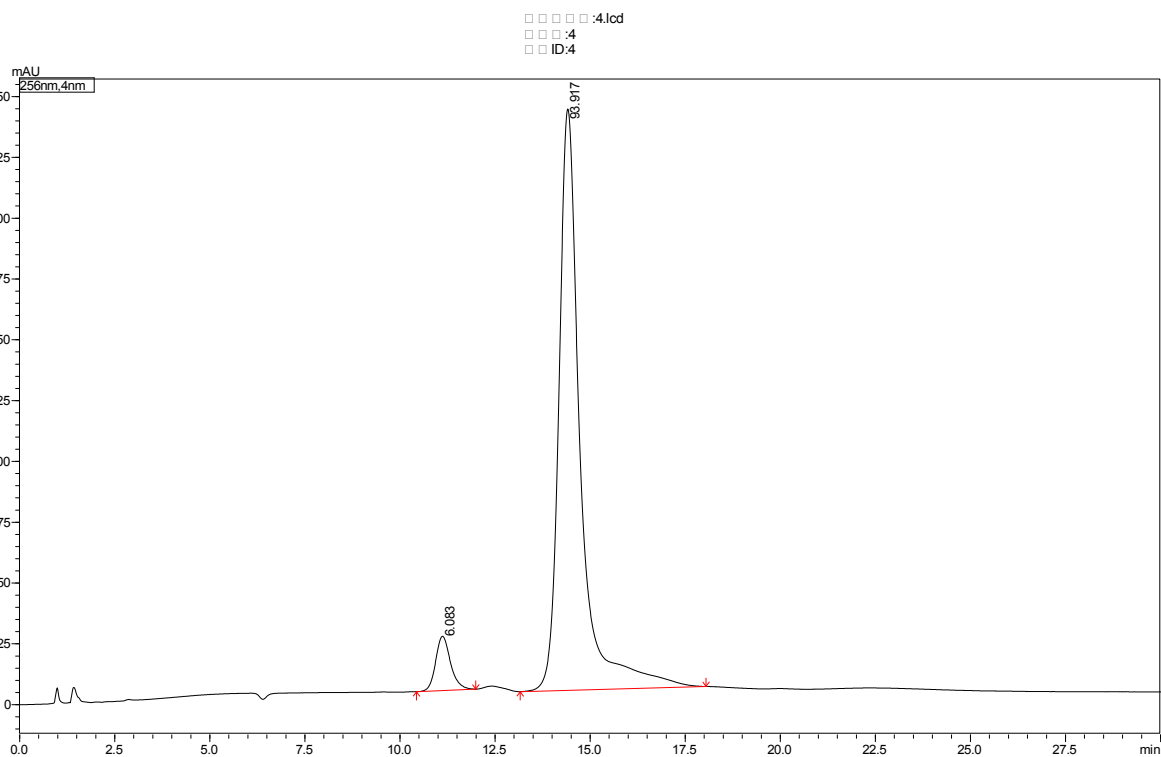

Figure S6 HPLC CHROMATOGRAPH OF 4-(prop-1-en-2-yl)-N-(3-(trifluoromethyl)phenyl)cyclohex-1-ene-1-carboxamide (**4**) obtained on a Shimadzu Hplc system (conditions:  $\lambda_{max}$ = 256.0 nm, mobile phase methanol/double-deionized water= 70/30, flow rate = 1.0 ml, temperature= 30 °C, analysis time = 0-30 mins)

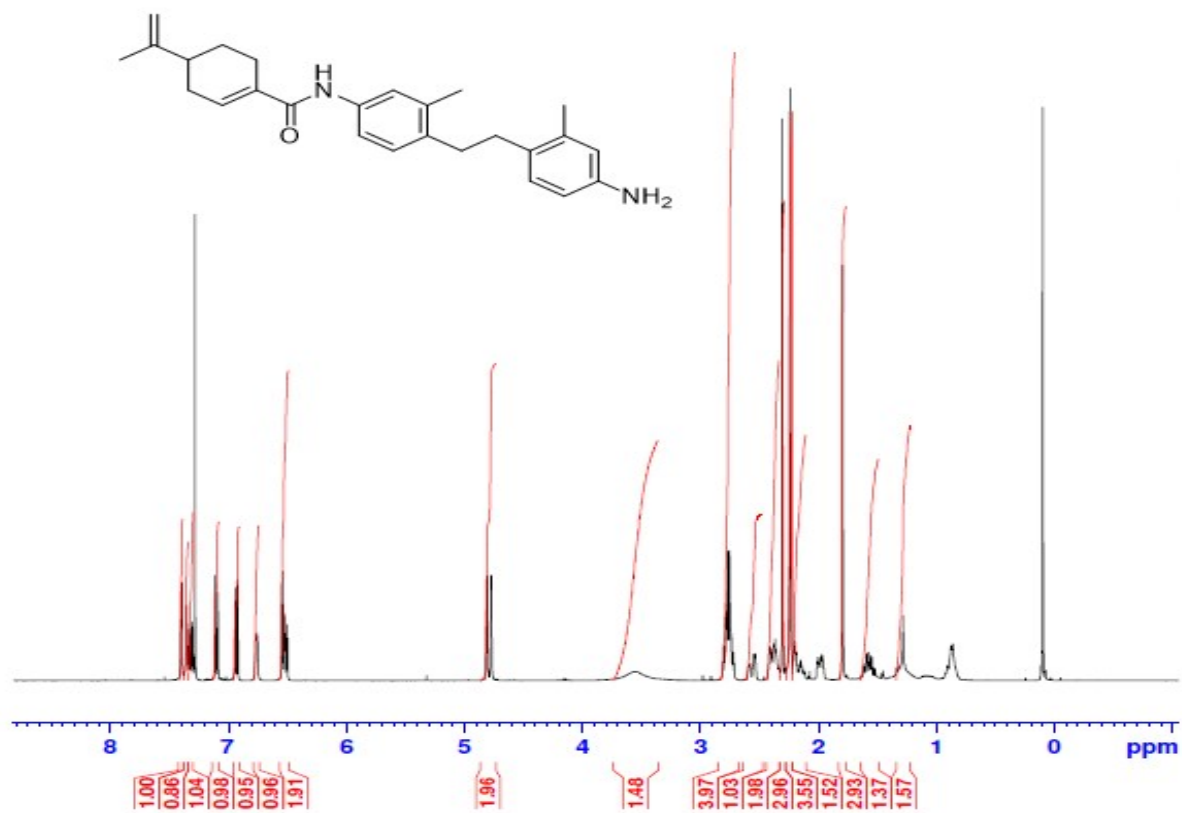

Figure S7 <sup>1</sup>H NMR spectrum of N-(4-(4-amino-2-methylphenethyl)-3-methylphenyl)-4-(prop-1-en-2-yl)cyclohex-1-ene-1-carboxamide (**5**) obtained on NMR spectrometer (Bruker 400 Ultra Shield™)

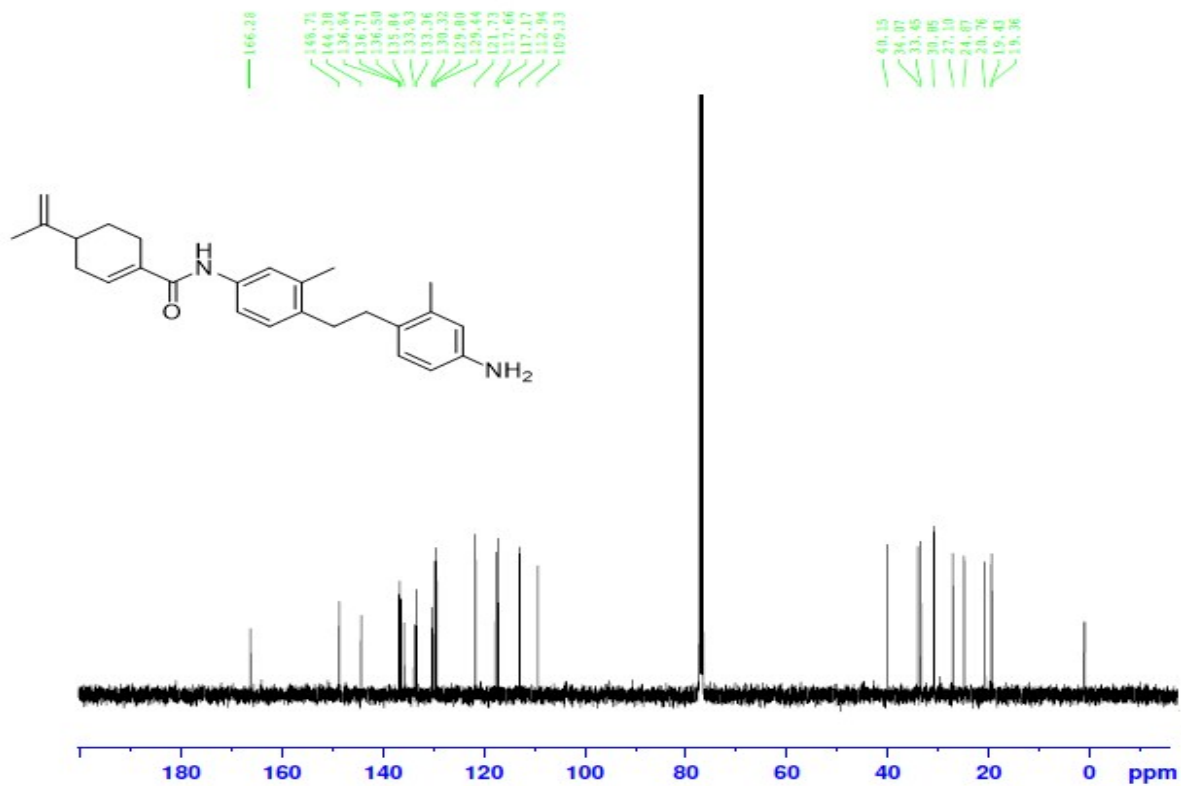

Figure S8 <sup>13</sup>C NMR spectrum of N-(4-(4-amino-2-methylphenethyl)-3-methylphenyl)-4-(prop-1-en-2-yl)cyclohex-1-ene-1-carboxamide (5) obtained on NMR spectrometer (Bruker 400 Ultra Shield™)

Spectrum from 5.wiff (sample 1) - 5, ..., +TOF MS (100 - 2500) from 4.808 min

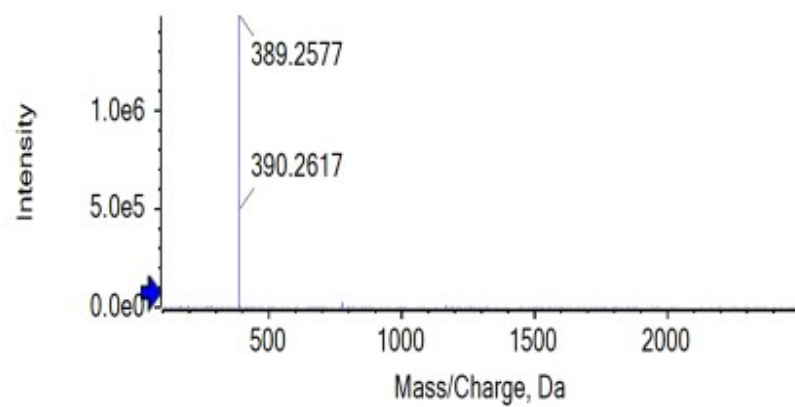

Figure S9 HRMS OF N-(4-(4-amino-2-methylphenethyl)-3-methylphenyl)-4-(prop-1-en-2-yl)cyclohex-1-ene-1-carboxamide (5) [M+H] peak

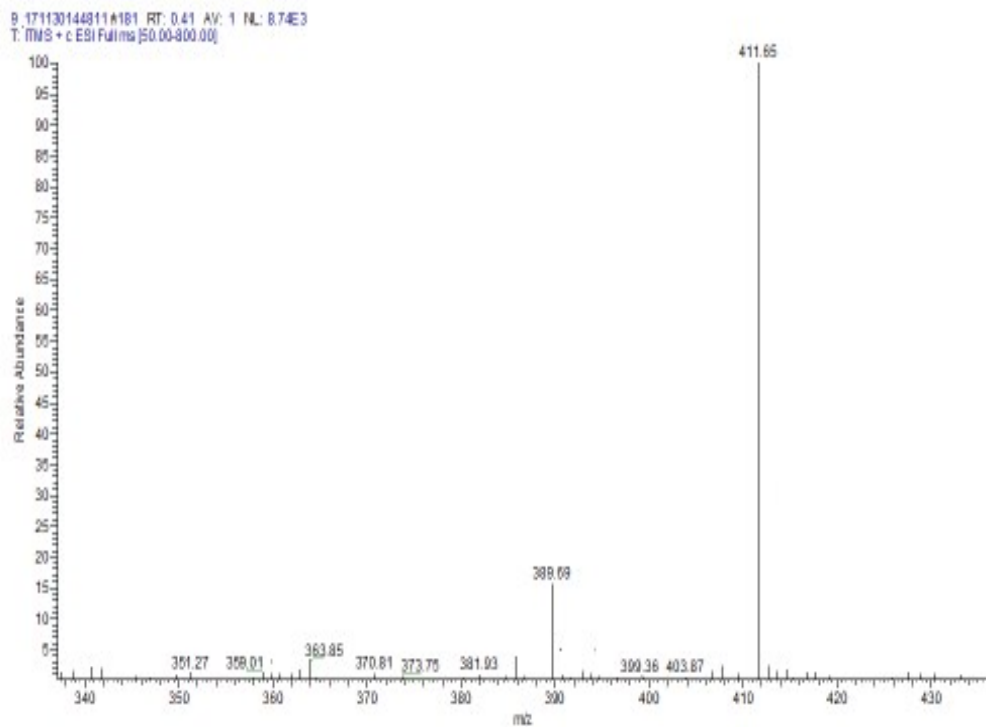

Figure S10 ESI-mass spectrum of N-(4-(4-amino-2-methylphenethyl)-3-methylphenyl)-4-(prop-1-en-2-yl)cyclohex-1-ene-1-carboxamide (5), [M+H] and [M+Na] peaks obtained on liquid-mass spectrometer



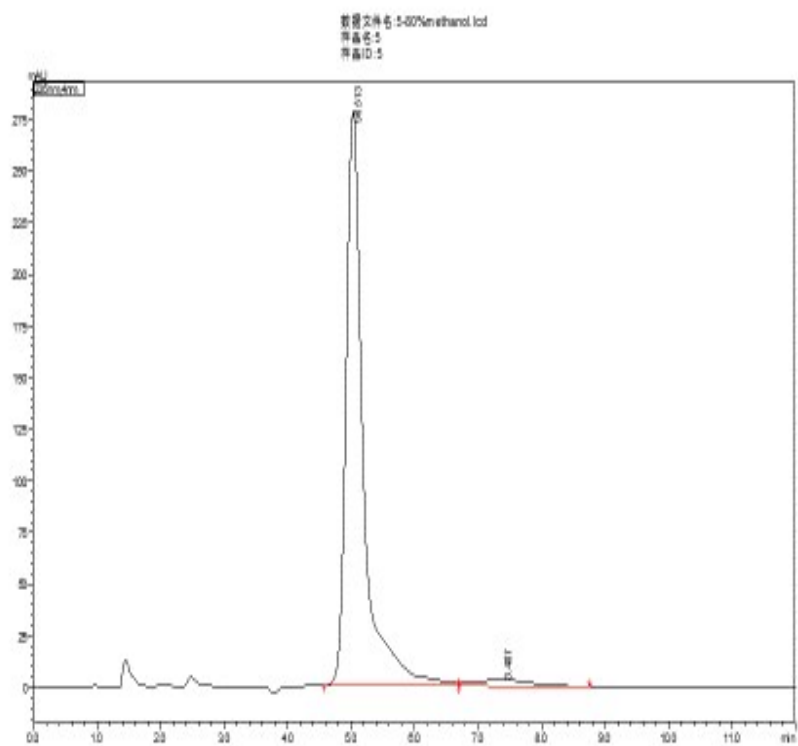

Figure S11 HPLC chromatograph of N-(4-(4-amino-2-methylphenethyl)-3-methylphenyl)-4-(prop-1-en-2-yl)cyclohex-1-ene-1-carboxamide (**5**) obtained on a Shimadzu Hplc system (conditions:  $\lambda_{max}$ = 236.0 nm, mobile phase methanol/double-deionized water= 80/20, flow rate = 1.0 ml, temperature= 30 °C, analysis time = 0-20 mins)

20171226-1-H

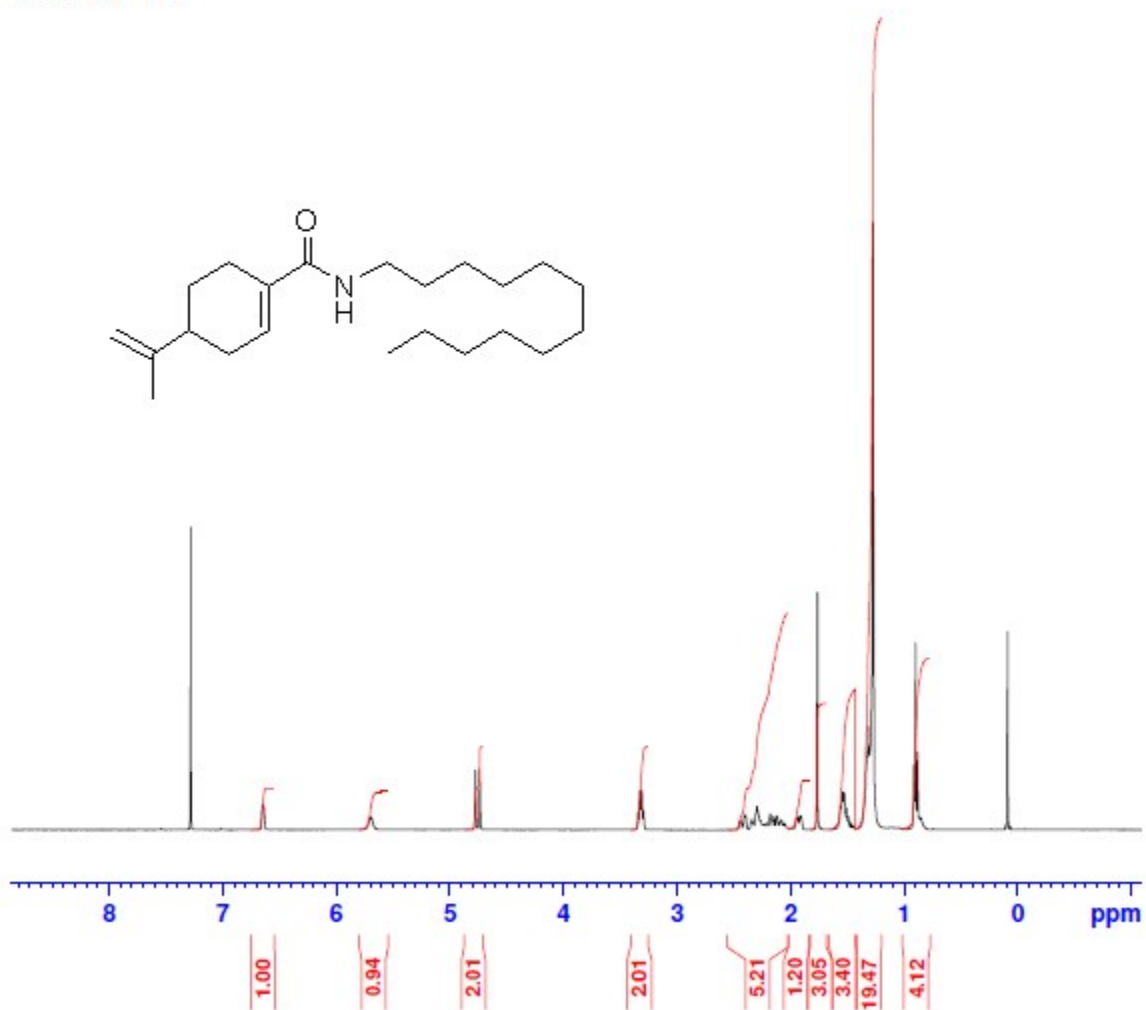

Figure S12 <sup>1</sup>H NMR spectrum of N-dodecyl-4-(prop-1-en-2-yl)cyclohex-1-ene-1-carboxamide (**2**) obtained on NMR spectrometer (Bruker 400 Ultra Shield™)

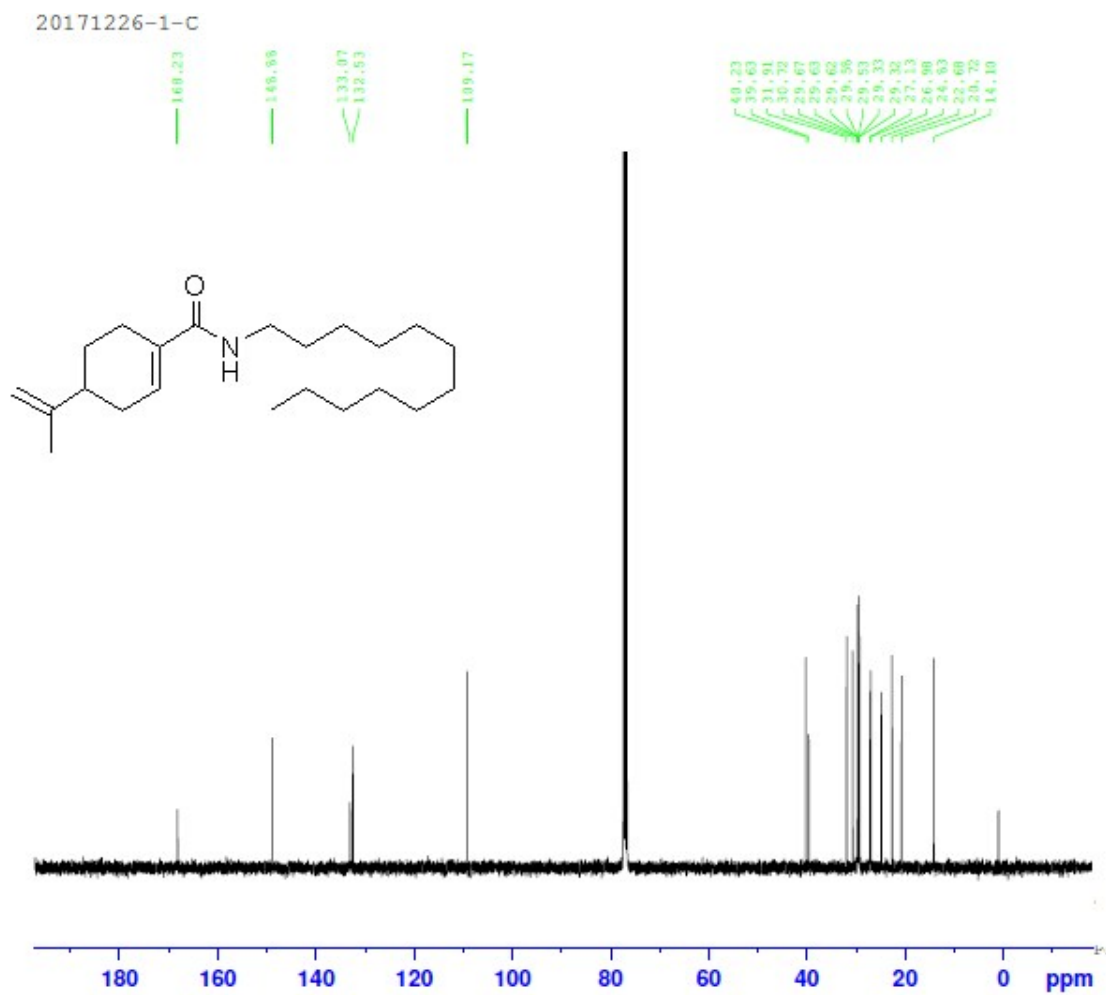

Figure S13 <sup>13</sup>CNMR spectrum of N-dodecyl-4-(prop-1-en-2-yl)cyclohex-1-ene-1-carboxamide (**2**) obtained on NMR spectrometer (Bruker 400 Ultra Shield™)

4\_171130144811#71 RT: 0.15 AV: 1 NL: 1.87E4  
T: ITMS + cESI Full ms [50.00-600.00]

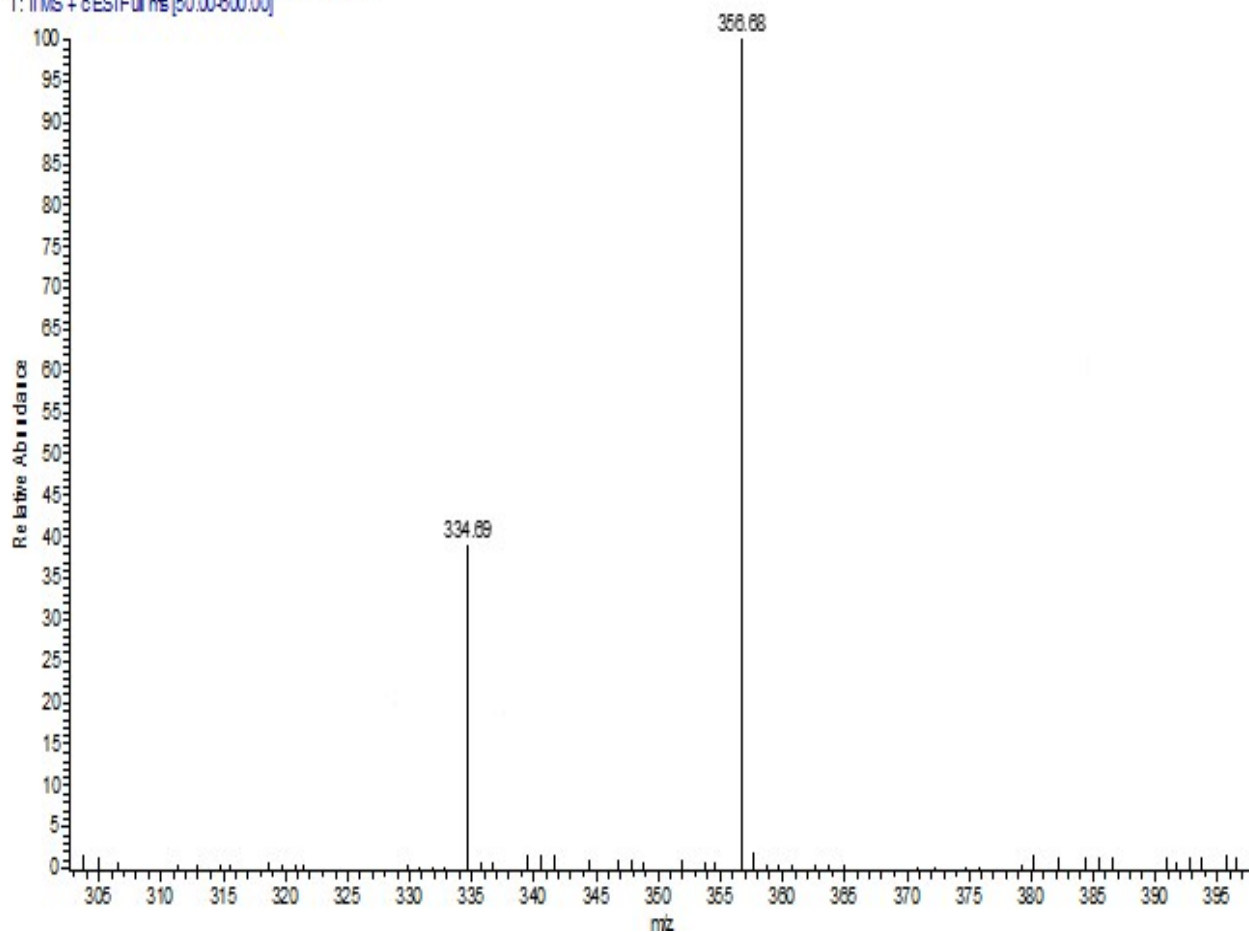

Figure S14 ESI mass spectrum of N-dodecyl-4-(prop-1-en-2-yl)cyclohex-1-ene-1-carboxamide (2), [M+H] and [M+Na] peaks obtained on liquid- mass spectrometer

〈色谱图〉

mAU

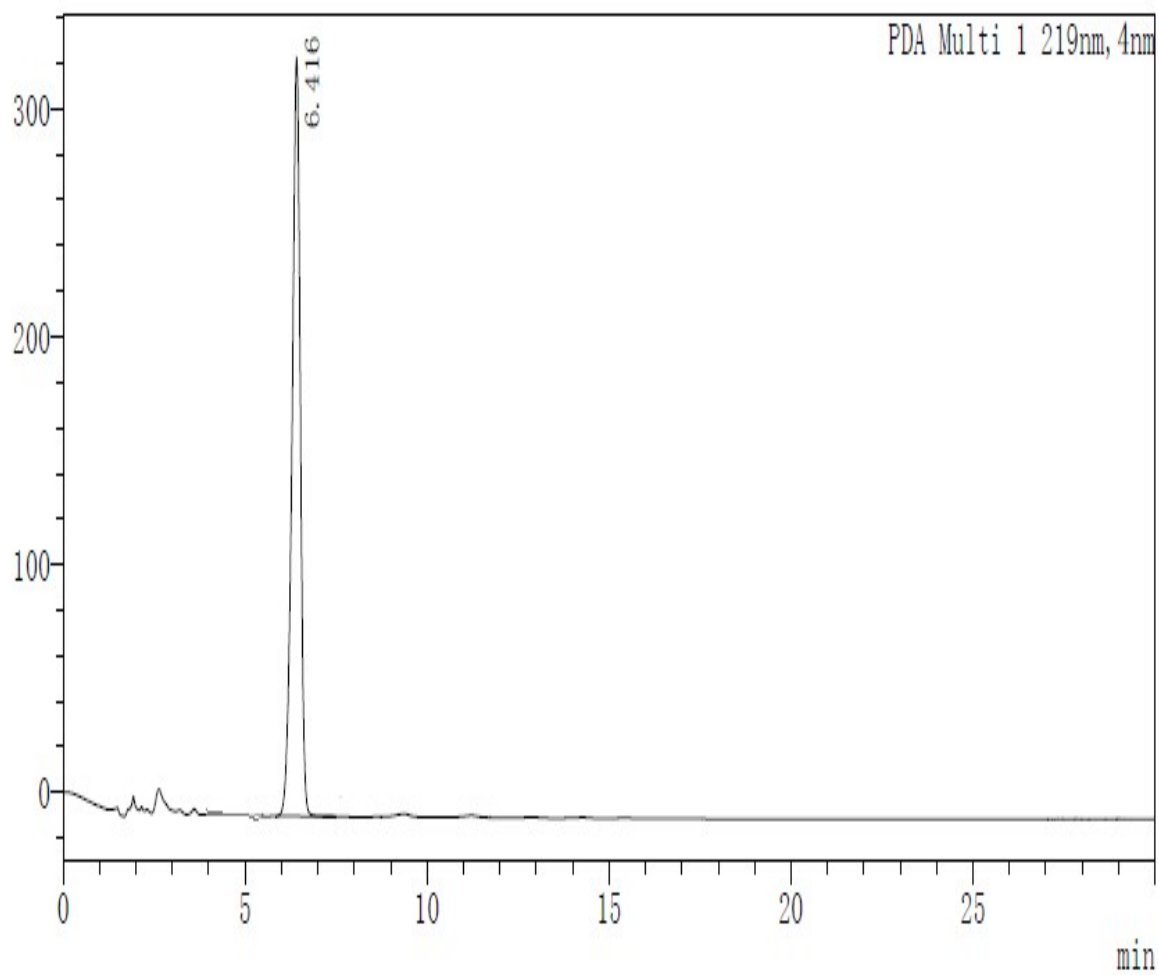

Figure 15S HPLC chromatograph of N-dodecyl-4-(prop-1-en-2-yl)cyclohex-1-ene-1-carboxamide (2) obtained on a Shimadzu Hplc system (conditions:  $\lambda_{max}$ = 219.0 nm, mobile phase methanol/double-deionized water= 90/10, flow rate = 1.0 ml, temperature= 30 °C, analysis time = 0-30 mins)
